# Supplementary material for: Simultaneous Detection of Common Founder Mutations Using a Cost-Effective Deep Sequencing Panel
Source: MDPI journal article supplement (doi:10.3390/genes15050646), 2024-05-20
Supplement: s1 [file s1]

# SUPPLEMENTAL MATERIAL

## Simultaneous Detection of Common Founder Mutations using a Cost-Effective Deep Sequencing Panel

Sapir Shalom<sup>1,2</sup>, Mor Hanany<sup>1</sup>, Avital Eilat<sup>1</sup>, Itay Chowders<sup>1</sup>, Tamar Ben-Yosef<sup>3</sup>,  
Samer Khateb<sup>1</sup>, Eyal Banin<sup>1</sup>, Dror Sharon<sup>1</sup>

1- Department of Ophthalmology, Hadassah Medical Center, Faculty of Medicine,  
The Hebrew University of Jerusalem, 91120 Jerusalem, Israel.

2- Department of Military Medicine and "Tzameret", Faculty of Medicine, Hebrew  
University of Jerusalem and Medical Corps, Israel Defense Forces, Jerusalem, Israel.

3- Rappaport Faculty of Medicine, Technion - Israel Institute of Technology, Haifa,  
Israel.

Corresponding author:

Dror Sharon, PhD., Department of Ophthalmology, Hadassah-Hebrew University  
Medical Center, Jerusalem, Israel, 91120; Phone: +972 2 6777112; Fax: +972 2  
6448917; E-mail: [dror.sharon1@mail.huji.ac.il](mailto:dror.sharon1@mail.huji.ac.il)

**Keywords:** NGS, panel sequencing, Inherited retinal diseases, primers

## Supp Figure S1

2. ABCA4- c.5882G>A, chr1:94486960C>G  
TGTTCCCTGCTATTTCATCTCGGGCACTGACACAGGGCCTCAGTGAGAATCACTCCAGCTG  
AGCATCATTCCCTTTTCTGTGTTCTGTTTCTGCAGAGCATGGGTCAGCCTCGAGATGTCT  
CAGTACTCACCACACCTCTGTGCCTGCCCATGTCAATATGTAACCTCCTAGTGCTGGTAG  
TTTTCTCCTAAACCATCCTTTGCTCTTTGTTCCCTCTTCCCTCCCTTGCTCTCACCTGT  
CTCAGTTCTCAGTCCGGTTTCTTCGTATCTTGCAGATTTATCCAGGCACCTCCAGCCCAG  
CAGTGGACAGGCTGTGTGTCGGAGTTCGCCCTGGAGAGGTGGGTACTCTGCAGACCACGT  
GTGAAAGGCTTCCGAACATCAGCTCTTGTGCCTGCCTCTCCTCCCCATAAGGCAGAGCTA  
TTCAATAGGAACATAATGCCATAATGCAAGTCACATATGTAATTTTAAATCTTCCACTAG  
CCACATGAGAAAAGTAAAAAGAAAATAGGTAAAATTAATTTTATTAGTATTTTTTATTTT

An example of a sequence that was used as an input in FastPCR. In this figure one of the founder mutations from the panel is presented (marked in yellow). The brackets (marked in red) are used to define the preferred primer location. The software designs the primers in the areas bounded by the brackets. The selected primers are marked in green.
